# Supplementary material for: The Association of Plasma-Free Branched-Chain Amino Acids with Disease Related Parameters in Ulcerative Colitis
Source: MDPI journal article supplement (doi:10.3390/diagnostics10100798), 2020-10-08
Supplement: s1 [file s1]

1 **Table S1.** Dietary intakes and MedDiet score of patients with UC and of HC.

|                               | <b>UC patients<br/>Mean ± SD</b> | <b>HC<br/>Mean ± SD</b> | <b>P</b> |
|-------------------------------|----------------------------------|-------------------------|----------|
| <b>Energy (kcal)</b>          | 1868.5±760.4                     | 2164.3±1279.1           | 0.488    |
| <b>Protein (g)</b>            | 91.0 ±48.7                       | 81.5±34.7               | 0.652    |
| <b>Carbohydrates (g)</b>      | 223.0 ±135.8                     | 238.5±98.5              | 0.313    |
| <b>Fats (g)</b>               | 76.0± 42.6                       | 96.7±113.8              | 0.971    |
| <b>Saturated FA (g)</b>       | 22.8±13.3                        | 27.0±2.6                | 0.354    |
| <b>Monounsaturated FA (g)</b> | 33.4±21.4                        | 43.0±81.2               | 0.603    |
| <b>Polyunsaturated FA (g)</b> | 12.7±9.9                         | 13.3±14.7               | 0.846    |
| <b>Fiber (g)</b>              | 12.3±11.4                        | 18.9±14.2               | 0.051    |
| <b>MedDiet score</b>          | 30.0±5.7                         | 32.3±5.8                | 0.133    |

2 Values are presented as mean±SD. Differences between groups were analysed by Mann-

3 Whitney U test or Student's test. Difference was considered significant at  $P<0.05$ .
